# Supplementary material
Source: ML conference proceedings conference paper supplement (https://openreview.net/forum?id=dVfNPSzpnv)
Supplement: supplementary_material [file attachment]

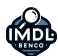

# IMDL-BenCo: A Comprehensive Benchmark and Codebase for Image Manipulation Detection & Localization (Supplementary Materials)

Xiaochen Ma<sup>1†</sup>, Xuekang Zhu<sup>1†</sup>, Lei Su<sup>1†</sup>, Bo Du<sup>1†</sup>, Zhuohang Jiang<sup>1†</sup>, Bingkui Tong<sup>1†</sup>,  
Zeyu Lei<sup>1,2†</sup>, Xinyu Yang<sup>1†</sup>, Chi-Man Pun<sup>2</sup>, Jiancheng Lv<sup>1,3</sup>, Jizhe Zhou<sup>1,3\*</sup>

<sup>1</sup>College of Computer Science, Sichuan University, China

<sup>2</sup>Department of Computer and Information Science, University of Macao, Macao SAR

<sup>3</sup>Engineering Research Center of Machine Learning and Industry Intelligence, MOE, China

## 1 Opensource of IMDL-BenCo codebase

Our code repository is now largely developed, with the core training framework and reproduction scripts for 8 SoTA models and multiple backbone models already open-sourced at <https://github.com/scu-zjz/IMDLBenCo/>. Other related functionalities will be released gradually in this month after thorough testing, and confirmation that the policies do not conflict with those of the dataset providers. Including the following features:

- Install and download via PyPI
- Based on command line invocation, similar to conda in Anaconda<sup>2</sup>.
  - Dynamically create all training scripts to support personalized modifications.
  - Listing and downloading all dataset or provide the link to the website for dataset through command line.
- Information library, downloading, and re-management of IMDL datasets.
- Support for Weight & Bias visualization.
- Documentation based on Github Page.

So, refer to the GitHub version for the complete codebase, rather than relying solely on the Supplementary version.

## 2 License

This work is licensed under the *CC-BY-4.0* license<sup>3</sup>. This license enables reusers to distribute, remix, adapt, and build upon the material in any medium or format, so long as attribution is given to the creator. The license allows for commercial use. CC BY includes the following elements:

- BY: credit must be given to the creator.

<sup>†</sup>Equal contribution.

<sup>\*</sup>Corresponding author: Jizhe Zhou (jzzhou@scu.edu.cn)

<sup>2</sup><https://www.anaconda.com/>

<sup>3</sup><https://creativecommons.org/licenses/by/4.0/>

## 22 **3 Maintenance Plan**

### 23 **3.1 Overview**

24 This maintenance plan outlines the steps and procedures to ensure the smooth operation and ongoing  
25 relevance of the IMDL-BenCo. The plan includes regular updates, monitoring, issue resolution, and  
26 community engagement.

### 27 **3.2 Regular Updates**

#### 28 **3.2.1 Dataset Updates**

29 **Frequency:** Quarterly

30 **Actions:**

- 31 – Review and update the benchmark datasets to include recent data.
- 32 – Adding revise script managing scripts to it.
- 33 – Document any changes or additions to the datasets.

#### 34 **3.2.2 SoTA Model Updates**

35 **Frequency:** Biannually

36 **Actions:**

- 37 – Review the current SoTA models.
- 38 – Update or replace SoTA models to reflect state-of-the-art techniques.
- 39 – Re-train models on updated datasets.
- 40 – Document performance metrics and changes.

#### 41 **3.2.3 Feature Updates**

42 **Frequency:** Quarterly

43 **Actions:**

- 44 – Identify and implement new features or enhancements to the IMDL-BenCo.
- 45 – Conduct user feedback sessions to prioritize feature development.
- 46 – Test and deploy new features with appropriate documentation.

### 47 **3.3 Issue Resolution**

#### 48 **3.3.1 Bug Fixes**

49 **Frequency:** As needed

50 **Actions:**

- 51 – Track and document reported bugs.
- 52 – Prioritize and address critical bugs immediately.
- 53 – Deploy fixes and test to ensure resolution.

#### 54 **3.3.2 Participant Support**

55 **Frequency:** Ongoing

56 **Actions:**

- 57 – Provide a support channel (e.g., Github issue, forum, email) for participants.
- 58 – Respond to participant queries within 48 hours.

59 **3.4 Community Engagement**

60 **Frequency:** Monthly

61 **Actions:**

- 62 – Send out a monthly newsletter with updates and important information.
- 63 – Engage with the community on social media and forums.

64 **3.5 Documentation**

65 **3.5.1 Maintenance Logs**

66 **Frequency:** Ongoing

67 **Actions:**

- 68 – Maintain detailed logs of all maintenance activities.
- 69 – Document changes to datasets, models, and system configurations.

70 **3.5.2 Participant Documentation**

71 **Frequency:** Ongoing

72 **Actions:**

- 73 – Keep participant guidelines and documentation up to date.
- 74 – Ensure clarity and accessibility of all documentation materials.

75 By following this maintenance plan, we aim to ensure the IMDL-BenCo remains a valuable and  
76 reliable resource for the research community.
